# Supplementary material for: Human-AI co-creation to map dementia lived experience at scale
Source: Research Square preprint supplement (doi:10.21203/rs.3.rs-7333326/v1), 2025-08-18
Supplement: Supplementary file 1 [file 57b1ac192a4345ef6a7dac20.docx]

| ****Forum**** | ****Subforum**** | ****N posts**** |
| --- | --- | --- |
| ****Welcome and how to use the Forum**** | Say Hello and Introduce Yourself | 56,768 |
| How to use the Dementia Support Forum | 362 |
| ****Support from other members**** | I have dementia | 21,153 |
| I have a partner with dementia | 189,121 |
| I care for a person with dementia | 312,207 |
| Younger people with dementia and their carers | 26,936 |
| LGBT+ people with dementia and carers | 768 |
| Memory concerns and seeking a diagnosis | 18,276 |
| Recently diagnosed and early stages | 13,997 |
| Middle - later stages | 46,669 |
| End of life care | 25,807 |
| After dementia — dealing with loss | 46,332 |
| ****Information and resources**** | Dementia-related news and campaigns | 22,177 |
| Legal and financial issues | 69,701 |
| Helpful websites | 880 |
| Health and wellbeing | 6151 |
| Books, film and music | 2154 |
| Equipment and technology | 4174 |
| Fundraising for Alzheimer's Society | 1733 |
| Researchers, students and professionals | 7899 |
| Expert Q&As | 393 |
| ****Alzheimer's Society news, notices, videos**** | Alzheimer's Society news, notices and videos | Not included |
| Videos and podcasts |
| ****Archive**** | ARCHIVE: Support discussions | 348,100 |
| ARCHIVE: Resources | 3624 |
| *N posts = number of posts*  *Q&A = question and answer* |  |  |

**Table S1. Overview of Dementia Support Forum website structure and list of subforums included in analysis.**

**S1. List of custom stop words added to BERTopic .**

'with', 'my', 'your', 'she', 'this', 'was', 'her', 'have', 'as', 'he', 'him', 'but', 'not', 'so', 'are', 'at', 'be', 'has', 'do', 'got', 'how', 'on', 'or', 'would', 'will', 'what', 'they', 'if', 'or', 'get', 'can', 'we', 'me', 'can', 'has', 'his', 'there', 'them', 'just', 'am', 'by', 'that', 'from', 'it', 'is', 'in', 'you', 'also', 'very', 'had', 'a', 'an', 'for'

**S2. LLM output of condensed BERTopic clusters and interpretations.**

**1. Caring for Loved Ones with Dementia**

- This theme includes discussions from caregivers about the challenges of looking after a loved one with dementia, whether a spouse, parent, or other relative.
- Topics include how to manage day-to-day responsibilities, such as meal preparation, hygiene, and ensuring safety in the home.
- There are also emotional struggles shared, such as the difficulty of watching a loved one’s cognitive decline and balancing caregiving with work or personal life.
- Many posts mention **financial concerns**, like how to afford care services, access benefits, and navigate complex legal processes like pension management.
- Family conflicts often arise, especially among siblings or extended family members, when making decisions about care responsibilities.

**2. Personal Stories and Community Support**

- Many forum members share personal narratives about their experiences with dementia, either as caregivers or individuals diagnosed with the disease.
- These posts range from early symptoms and diagnosis stories to long-term experiences of caring for someone in later stages.
- The forum provides a space for emotional expression, including grief, guilt, frustration, and moments of joy.
- Some posts highlight positive experiences, such as meaningful interactions with a loved one, while others share the emotional toll of dementia on relationships.
- Users also support each other through **compassionate responses**, advice, and shared experiences, fostering a sense of community.

**3. Navigating Healthcare and Social Services**

- A significant portion of discussions focus on how to access **healthcare support, funding, and legal resources** for dementia care.
- **Continuing Healthcare (CHC) funding** is a major topic, as users navigate assessments, eligibility criteria, and appeals when funding is denied.
- There is frustration over bureaucratic processes, with caregivers struggling to get proper assessments and financial support for their loved ones.
- Discussions about **care home selection**—how to choose the right facility, what to look for, and how to ensure good care—are common.
- Many users seek advice on dealing with hospital visits, emergency care situations, and interactions with healthcare professionals.
- Legal matters, especially **Lasting Power of Attorney (LPA)**, come up frequently as caregivers try to handle financial and medical decisions on behalf of their loved ones.

**4. Dementia Awareness and Public Perception**

- This theme focuses on societal attitudes toward dementia and how to **raise awareness and combat stigma**.
- Users discuss the challenges of getting others to understand the realities of dementia, particularly when dealing with family, friends, or even healthcare providers.
- Conversations also cover **media portrayals of dementia**, with some users praising efforts to increase awareness while others critique misleading or overly simplistic representations.
- There are discussions about **advocacy efforts**, including how to push for better support services, improved dementia research, and policy changes.

**5. Managing Symptoms and Daily Challenges**

- Caregivers frequently seek advice on handling difficult behaviors, such as **agitation, aggression, wandering, and confusion**.
- Sleep disturbances are a major concern, with many posts about nighttime restlessness, sundowning, and strategies for improving sleep patterns.
- **Incontinence care** is another widely discussed issue, with caregivers exchanging tips on different types of protective pads, how to encourage dignity in care, and how to manage hygiene challenges.
- Medication-related discussions focus on balancing benefits and side effects, as well as exploring alternative treatments such as aromatherapy or music therapy.
- Some posts discuss adapting the home environment to improve safety, such as **installing alarms, using visual cues, and creating familiar routines** to reduce distress.

**6. Caregiver Well-being and Mental Health**

- Many posts reflect the **emotional burden of caregiving**, including stress, exhaustion, and feelings of helplessness.
- Caregivers express guilt over decisions such as moving a loved one into a care home or feeling frustrated with the demands of care.
- There is discussion about **how to set boundaries** and make time for self-care while managing overwhelming responsibilities.
- Some caregivers share feelings of **isolation**, especially if they are the sole provider of care, and discuss ways to connect with others in similar situations.
- Mental health struggles such as **depression and anxiety** are frequently discussed, with many users offering encouragement and suggesting professional support options.

**7. Pet Care and Dementia**

- A niche but notable topic involves the role of **pets in dementia care**, with discussions on how animals provide companionship and emotional support.
- Some caregivers seek advice on whether to keep or rehome a pet when their loved one’s condition worsens.
- There are also challenges mentioned, such as ensuring pets are properly cared for when the primary caregiver is overwhelmed.
- Users share heartwarming stories about how pets bring joy to individuals with dementia, such as **comforting them during moments of confusion or providing a sense of routine**.

**Table S2. Manifest content codebook.**

| Name | Description | Sources | References |
| --- | --- | --- | --- |
| **Caregiving** | | | |
| Advocacy | Caregivers often need to advocate or fight on behalf of their loved ones, whether this be in public settings or with healthcare professionals. | 5 | 17 |
| Coping | Caregivers can find it difficult to cope, ask for help and often use distraction techniques as a way of coping. | 6 | 14 |
| Difficulties | Caregivers experience difficulties such as having to accept their new role or give up the life they once lived. | 6 | 26 |
| I Know Something Is Wrong | The sense of knowing something is wrong. | 1 | 4 |
| I Lied To My Dad Everyday | Caregivers may lie to PLWD as a way of keeping the conversation in a happy tone. | 1 | 1 |
| Need To Protect | The desire to protect a loved one from danger, keep them free from harm and have their best interests in mind. | 5 | 20 |
| No Time To Feel | No time to feel | 1 | 1 |
| Not Having Time To Yourself | Caregiving takes up a lot of time and even going to the bathroom can be a struggle. | 5 | 9 |
| Offering Guidance | Signposting PLWD to help them maintain independence. | 1 | 2 |
| Putting On A Mask To Protect A Loved One | Dealing with difficulties privately and not sharing this with PLWD – acting as if everything is okay. | 4 | 5 |
| Safeguarding - 3 Steps Ahead | Thinking and planning ahead as a way of safeguarding. | 1 | 1 |
| Self-Care In A Caring Role | Not maintaining own health and wellbeing due to focusing on PLWD. | 1 | 4 |
| Splitting Yourself In Two | The feeling of having to be in multiple places at once. | 2 | 2 |
| Stepping Into Their World Keeps Them Calm | Caregivers describe it being useful to step into the PLWD world as they are no longer present in the current life. | 2 | 2 |
| Will This Happen To Me Too | The worry that it may happen to caregiver one day too. | 1 | 1 |
| **Diagnosis Journey** | | | |
| Challenging Professional Opinion | Asking for second opinions can be difficult but necessary. | 1 | 2 |
| Comparison Of Dementia To Other Diseases | Support and treatment for dementia is compared to other illnesses such as Cancer and Diabetes. | 5 | 12 |
| Description Of Dementia | How PLWD and CG describe the disease in the metaphorical sense. | 2 | 2 |
| Diagnosis Reaction | Reactions such as relief, shock and denial. Relief stems from now being able to access support or make sense of the symptoms. | 8 | 16 |
| Diagnosis Takes Time | Getting a diagnosis can be time consuming with waiting lists and not being referred on first presentation. | 5 | 9 |
| Diagnostic Pathways | Descriptions of the pathway such as ‘trigger point’ for seeking help and what happens en route to diagnosis such as MRI scans. | 8 | 20 |
| Dont Ignore The Signs | PLWD urge those with worries to seek medical advice. | 1 | 1 |
| Falling Through The System | Symptoms being dismissed or not being contacted when advised. | 4 | 7 |
| Forget Appointments | PLWD forgetting appointments, therefore delay occurs. | 1 | 1 |
| Genetic Links | PLWD and CG link dementia to genetics on numerous occasions. | 4 | 11 |
| Get Things Organised Early While I Still Can | PLWD discuss future planning while they have capacity. | 1 | 2 |
| Health Problems Speeding Up Illness | Decline in overall health has ‘sped up’ the dementia. | 2 | 3 |
| I Became Unwell Overnight | The feeling of things changing overnight. | 1 | 1 |
| I Could Have Been Diagnosed Earlier | PLWD discuss the possibility of earlier diagnosis if they attended GP upon first concerns. | 1 | 1 |
| Im Not Ready To Lose My Independence Yet | Independence is important to PLWD and they don’t feel ready to lose this. | 1 | 1 |
| Its Not A Diagnosis Of Death | CG discuss the apologetic response from others as if they would respond to a death. | 1 | 1 |
| Misdiagnosis And Delay | Incorrect diagnosis such as depression, other form of dementia, underlying health conditions masking dementia. | 3 | 14 |
| No Cure | PLWD discuss there is no cure. | 2 | 4 |
| Not Feeling Listened To | CG and PLWD do not feel listened to by their peers or health professionals. | 4 | 13 |
| Post Code Lottery Of Access And Support | CG and PLWD discuss variances in location for what care and support you receive. Some areas are better than others. | 4 | 6 |
| Symptom Recognition | Symptoms such as memory decline, bowel issues, large money withdrawals, hallucinations, loss of interest and fixation with TV or book characters. | 7 | 52 |
| Taking Part In Research | PLWD taking part in research studies but some are not eligible to do so. | 2 | 3 |
| Underlying Health Conditions | Underlying health conditions having an impact on dementia pathway as mimicking symptoms or speeding up disease. | 6 | 11 |
| **Feelings** | | | |
| Acceptance | Variance in acceptance of dementia although majority find it hard to accept. | 5 | 11 |
| Alienation | ‘Feeling like a martian’ and being different to those around you. | 3 | 4 |
| Anxiety | Anxiety within CG and PLWD as a result of uncertainty. | 5 | 14 |
| Awareness | Lack of awareness of dementia In those experiencing it. | 8 | 25 |
| Confusing | Confusing pathway – things don’t make sense. | 4 | 10 |
| Control | Wanting to be in control of things (CG and PLWD) | 2 | 2 |
| Denial | Denial from PLWD that something is wrong. | 4 | 4 |
| Devastation | CG describe feeling devastated | 1 | 1 |
| Encouragement | Providing or receiving encouragement from peers | 0 | 0 |
| Fluctuating Emotions | Emotions are not linear, changing everyday. | 2 | 5 |
| Frustration And Anger | Feeling frustrated and angry with the situation. | 5 | 22 |
| Gratitude | Grateful to those who have provided support. | 3 | 4 |
| Grief And Loss | Sense of grieving the person who once was. | 3 | 7 |
| Guilt | Guilt stemming from initial frustrations with PLWD or due to putting family members into care. | 6 | 9 |
| Helpless | Not being able to do anything about it. | 1 | 1 |
| Home Is A Feeling | Home is not a place; it is a feeling where the individuals memories are (childhood etc) | 1 | 2 |
| Home Was Where Her Memories Were | 1 | 1 |
| Hope Of Not Being Diagnosed | Not wanting to be told it was dementia. | 1 | 1 |
| I Am Too Young | PLWD describe feeling too young to have this. | 1 | 1 |
| I Lost Hope | Losing hope as nothing is changing. | 2 | 2 |
| I Want To Get Better | The desire to get better instead of getting help. | 1 | 1 |
| It Was Horrible - Bad | Description of the experience itself. | 2 | 3 |
| Loneliness And Isolation | Feeling lonely and isolated from peers but also in the relationship. | 5 | 17 |
| Love | Still maintaining love for them, wanting to do good by them | 2 | 5 |
| Neglect | Feelings of neglect at the hands of healthcare professionals | 2 | 2 |
| Optimism | Being optimistic about the future | 1 | 1 |
| Overwhelming | A lot of information, a lot of change | 1 | 1 |
| Personhood | Maintaining personal identify and traits, dementia doesn’t define you | 4 | 11 |
| Relief | Relief from diagnosis, some describe relief at EOL | 5 | 7 |
| Resentment | Resenting what has happened | 2 | 5 |
| Sad And Upset | Difficult to see change in a loved one or yourself | 1 | 1 |
| Shock | Shocked at diagnosis | 1 | 3 |
| Something Inside I Cant Get Out | Quote | 1 | 1 |
| Stress | Stressful journey looking after PLWD | 3 | 4 |
| Tired - Exhausted | Tiring | 4 | 9 |
| Trapped | CG describe feeling trapped as they can’t do simple things such as go to the shop for milk. | 1 | 3 |
| Trauma |  | 1 | 1 |
| Uncertainty | Uncertainty about what comes next | 5 | 16 |
| Unsupported | Lack of support from peers, support networks and healthcare professionals | 1 | 2 |
| Vulnerability | Feeling vulnerable or seeing someone else as vulnerable | 2 | 5 |
| Why Is This Happening | The question of why, people want to know why | 3 | 7 |
| Worry | Stems from uncertainty about the future | 1 | 10 |
| **Healthcare Experiences** | | | |
| Access To Care And Appointments | Where to access support but also variances in location affecting what is offered. | 6 | 12 |
| Bypassing The Patient To Speak To CG | CG describe professionals ignoring PLWD and not speaking to them even when they can speak for themselves. | 1 | 1 |
| Care Homes And Hospitals | Varied experiences with Care Homes and Hospitals – some speak highly whereas others have had very negative experiences. Choosing a care home is difficult and comes at a high cost. | 6 | 19 |
| Differences In Healthcare Approaches | How healthcare professionals approach cancer vs dementia – lack of empathy | 2 | 3 |
| GP Attendance | Attending the GP for initial concerns or new symptoms – some GPs are really informed but some CG note not feeling listened to | 7 | 19 |
| Increase In Care Requirements | As decline happens, there is an increase of care requirements | 3 | 7 |
| Medication | How PLWD manage medication varies depending on current ability. Some note frustration that no medication is available to help them. | 7 | 19 |
| Memory Tests | Experiences of memory tests and although passing, still showing signs of dementia. | 9 | 28 |
| Need For Inclusive Tests | You can pass the test and still have dementia – highly intelligent people will do better and be missed. | 2 | 2 |
| Previous Experience Impact On Testing | Some note that CT can be scary and thus will not have another one due to fear. | 3 | 4 |
| Regulation | CG notes a need for more regulation in care homes and medication goes missing | 1 | 1 |
| Understaffing | Places are understaffed so PLWD aren’t getting what they need | 2 | 6 |
| **Life Adjustments And Impact** | | | |
| Alcohol | No longer able to drink alcohol or alcohol negatively impacts | 1 | 1 |
| COVID | Impact of COVID – higher incidence of isolation for CG and PLWD – decline in available support, higher waiting times. PPE at bedside for EOL. | 7 | 15 |
| Decline | PLWD decline and how this impacts them and CG. | 5 | 17 |
| End Of Life Planning And Care | Discussions of EOL and planning in advance for this. Some experienced EOL during COVID where this was traumatic | 2 | 3 |
| Financial And Legal | Organizing things such as POA and Guardianship. Better to get in place early as it can take a lot of time. Looking after finances and checking insurances. | 8 | 27 |
| Giving Up Job | PLWD being paid off and this has been traumatic. CG having to give up job or drop hours to manage caring responsibilities. | 5 | 9 |
| Groundhog Day | Quote | 1 | 1 |
| I Just Got On With It | PLWD discuss just getting on with it as there is nothing they can do. | 2 | 2 |
| Incontinence | Experiencing incontinence and not knowing how to manage this. | 1 | 2 |
| Life Changes Completely | Quote | 1 | 1 |
| Lots Of Forms | Lots of forms required to be filled out – in relation to financial and legal, care homes etc. | 1 | 1 |
| Maintaining Independence | The desire to remain independence but gradual decline – difficult for PLWD and CG | 5 | 10 |
| Meaningful Activity | Doing activities such as jigsaws, crafts and wordsearches has been helpful during the journey | 7 | 13 |
| New Hobbies | Going to support groups and trying new things to find out you like them | 1 | 4 |
| Not Recognising Familiar Places | Unable to recognize home despite living there for a long time | 3 | 3 |
| Push Harder | The feeling of having to do more | 1 | 1 |
| Relationships | Emotional toll of relationships and changing roles within. | 6 | 18 |
| Senses | Loss of senses such as taste and smell | 1 | 1 |
| Sleep Disturbances | Waking up during the night / disturbed sleep | 6 | 10 |
| Still Doing Things You Love | Doing what you love such as listening to music | 4 | 6 |
| Technology | Enjoying using technology, technology as an aid, unable to use it | 2 | 4 |
| The 'New Self' | Takes time to adjust | 1 | 1 |
| The Dementia Affects All Of Us | Dementia doesn’t just affect PLWD, affects the whole network (ie family, friends) | 1 | 2 |
| The World Becomes Smaller | The world slowly becomes refined to your own home because of safety | 2 | 3 |
| Time | Not having much time left | 1 | 1 |
| Transport Restrictions | Unable to use public transport, stopping driving, relying on others to get places | 6 | 13 |
| UTI | Suffering from UTIs | 1 | 1 |
| What Worked Then Doesnt Now | Needs change | 1 | 1 |
| **Public Perception And Stigma** | | | |
| Age Perception | Its not just something old people get and dementia isn’t just old age | 5 | 7 |
| Attempts To Reduce Stigma | Speaking to professionals to advocate for others | 1 | 3 |
| Dementia Friendly Places | Places need to be more dementia friendly, places youd expect arent | 1 | 4 |
| Does Dementia Define You | To an extent it does define you | 1 | 3 |
| Having Dementia Doesnt Make You Stupid | Quote | 1 | 3 |
| Its Difficult To Explain Or Share | Difficult to explain symptoms or share difficulties with peers | 1 | 3 |
| Lack Of Understanding | No-one understands what it is like unless they have been through it | 5 | 7 |
| Media Representations | Mixed opinions of media, some find it should be better and say it carries negative perceptions whereas others believe media is doing a good job at raising awareness | 8 | 11 |
| My Family Blame Me | Quote | 1 | 1 |
| Not All Dementia Is The Same | Dementia varies from person to person, different types of dementia, everyones experience is different and unique | 7 | 18 |
| Pity | People pity those with dementia, it isn’t what we want | 1 | 2 |
| Police | Experiences with police due to accusations made from PLWD – trying to explain situation – most have been understanding | 2 | 2 |
| Sharing Own Experience | Sharing own experience can be helpful | 3 | 5 |
| Stigma | Lack of awareness increases stigma – ‘he’s lost his marbles’ | 5 | 13 |
| Workplace Reactions | Losing job instead of trying to accommodate, lack of compassion | 3 | 8 |
| You CAN Live Well | Quote | 1 | 1 |
| **Support** | | | |
| Burden | The sense of burdening others by sharing too much or asking for too much help | 1 | 1 |
| Care At Home | Experiences with care at home (varies dramatically with really good and really bad experiences of carers in the home. | 5 | 10 |
| Community Engagement | Engaging with others in the community boosts support | 3 | 8 |
| Confidence From Support | Gaining confidence | 1 | 4 |
| Family And Friends Support | Speaking to friends and family. Family caregiving roles. Shared roles within families. | 8 | 34 |
| Having People You Can Relate To | Speaking to those who have been through similar is supporting. | 3 | 3 |
| Helplines | Using helplines for advice instead of GP so as not to be dismissed. | 2 | 4 |
| Peer Networks And Support Groups | Going to support groups such as Alz Scotland and doing various activities. | 7 | 29 |
| Pets And Animal Therapy | Awareness of calming effects of pets | 1 | 1 |
| Positive Clinical Relationships | Having a good GP or psychiatrist or nurse is supportive | 5 | 12 |
| Post Diagnostic Support | Lack of post diagnostic support | 6 | 23 |
| Self Education | CG and PLWD self-educating on dementia to make sense of it / try support a loved one. Many taking part in courses. | 4 | 12 |
| Symptoms |  | 0 | 0 |
| Behavioural Changes | Changes to behaviour such as extreme fixation or ignoring a loved one | 4 | 8 |
| Hallucinations | Perceiving fiction characters as family members | 1 | 1 |
| Personality Changes | Out of character responses, changes such as lack of hugging | 3 | 9 |
| Showtiming | compensating for symptoms in presence of other people beyond carer | 1 | 2 |
| Sundowning |  | 2 | 3 |
| **Unmet Needs** | | | |
| A Lot Needs To Be Done | PLWD and CG feel as though more work is needed but unsure of what | 3 | 3 |
| Better Support For Young Onset | Lack of support available for younger onset | 2 | 5 |
| Care Comes In Patches | Quote | 1 | 3 |
| Change Is Slow | Things are not right, the system isn’t changing quick enough | 2 | 2 |
| Gaps In Professional Support Network | Interactions with GP, Psychiatry, Social Work and other professionals is not joined up. Having to explain more than once. Care home managers are not available. | 5 | 13 |
| Having Answers Wont Make A Difference | Knowing why won’t change anything | 1 | 1 |
| Health Boards Are Not Aware Of Research | Taking part in research and healthcare providers being shocked by information instead of offering research opportunities | 1 | 1 |
| Lack Of Information For Post Diagnosis | After diagnosis, PLWD and CG feel left alone and unsure of where to turn to | 7 | 16 |
| Lack Of Services | Not enough facilities to look after 24/7 | 1 | 1 |
| Not Enough Resources | Hospitals not having suitable number of bedding, towels etc | 3 | 7 |
| Not Getting What Youre Entitled To | Entitled to 1-year PDS but some not getting this | 3 | 3 |
| Not Sharing Information With Patient Or Caregiver | Going for scans and not being informed about what results are or what this means. Not including CG in conversations so things are being missed. | 4 | 11 |
| One Stop Shop For Support | There needs to be somewhere you can go to find everything you need. | 1 | 1 |
| Respite Is Not Available | Availability of respite care is not good | 1 | 2 |
| Signposting | Lack of signposting to help centre or informing of next steps | 2 | 5 |
| Untrained Staff | Staff untrained in how to deal with PLWD and their CG | 3 | 6 |
| We Need Support Once Things Progress More | Beyond 1-year PDS is when support is really needed as this is when things tend to get worse | 1 | 1 |
| You Feel Abandoned | Abandoned from support networks | 1 | 4 |

**Figure S1. First stage output provided to professional illustrator**

**
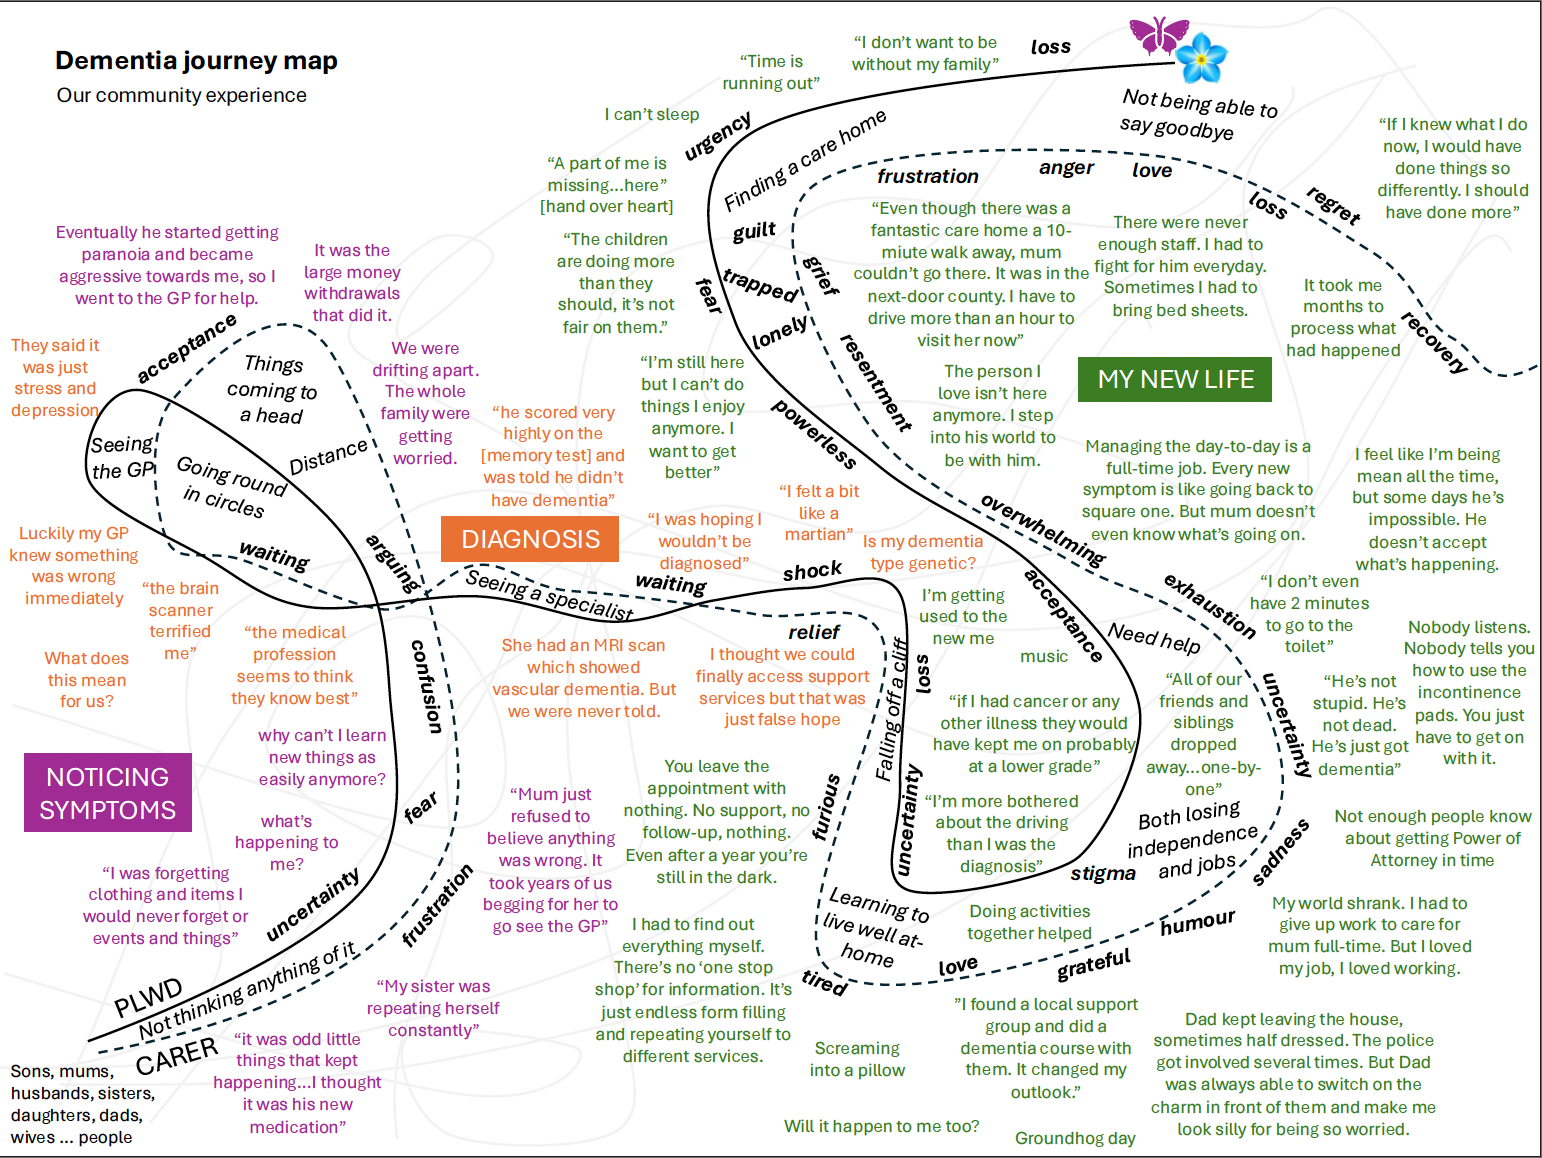
**
